# Supplementary material
Source: PubMed Central journal article supplement (PMC5710252)
Supplement: jamapsychiatry-74-729-s001.pdf [file jamapsychiatry-74-729-s001.pdf]

## Supplementary Online Content

van Agtmaal MJM, Houben AJHM, Pouwer F, Stehouwer CDA, Schram MT. Association of microvascular dysfunction with late-life depression: a systematic review and meta-analysis. *JAMA Psychiatry*. Published online May 31, 2017. doi:10.1001/jamapsychiatry.2017.0984

**eAppendix.** Search Terms Used for the Systematic Review and Meta-analysis

**eFigure 1.** Funnel Plot of Cross-Sectional Studies on the Association Between Microvascular Dysfunction and Depression; Plasma Markers for Endothelial Function (A), WMH (B), Microbleeds (C) And Microinfarctions (D)

**eFigure 2.** Forest Plots With the Odds Ratios and 95% Confidence Intervals for Original Studies and the Pooled Odds Ratios for the Cross-Sectional Association Between Cerebral Microbleeds and Depression

**eFigure 3.** Forest Plots With the Odds Ratios and 95% Confidence Intervals for Original Studies and the Pooled Odds Ratios for the Cross-Sectional Association Between Cerebral (Micro)Infarctions and Depression

**eFigure 4.** Funnel Plot of Cross-Sectional Studies on the Association Between White Matter Hyperintensities and Depression After Trim-and-Fill Analysis

**eFigure 5.** Funnel Plot of Longitudinal Studies on the Association Between Cerebral Small Vessel Disease and Depression

**eTable 1.** Quality Assessment of the Included Studies by Use Of the Newcastle-Ottawa Scale (NOS)

**eTable 2.** Characteristics of Studies Included in the Systematic Review and Meta-Analysis

**eTable 3.** Reported Results of Studies Included in the Systematic Review and Meta-analysis

**eReferences.**

This supplementary material has been provided by the authors to give readers additional information about their work.

**eAppendix.** Search Terms Used for the Systematic Review and Meta-analysis

We used the following terms to systematically search the current literature: “depression” OR “depressive disorder” OR “depress\*[Title]” AND 1) “sICAM-1” OR “sVCAM-1” OR “sE-selectin” OR “vWF” AND 2a) “capillary recruitment” OR “capillaroscopy” OR “laser-Doppler flowmetry” OR “capillaries” AND 2b) “L-NMMA” OR “sodium nitroprusside” OR “plethysmography” OR “forearm blood flow” OR “iontophoresis” OR “intracutaneous injection” AND 3) “urinary albumin excretion” OR “albuminuria” OR “macroalbuminuria” OR “microalbuminuria” AND 4) “retinal arteriolar diameter” OR “retinal venular diameter” OR “arteriovenous ratio” OR “retinal vessels” AND 5) “cerebral small vessel disease” OR “CSVD” OR “white matter lesion” OR “WML” OR “microbleeds” OR “microinfarctions” OR “lacunar infarctions”. The references of the identified studies were checked in order to identify additional relevant articles. The search was limited to humans and study populations aged >40 years.

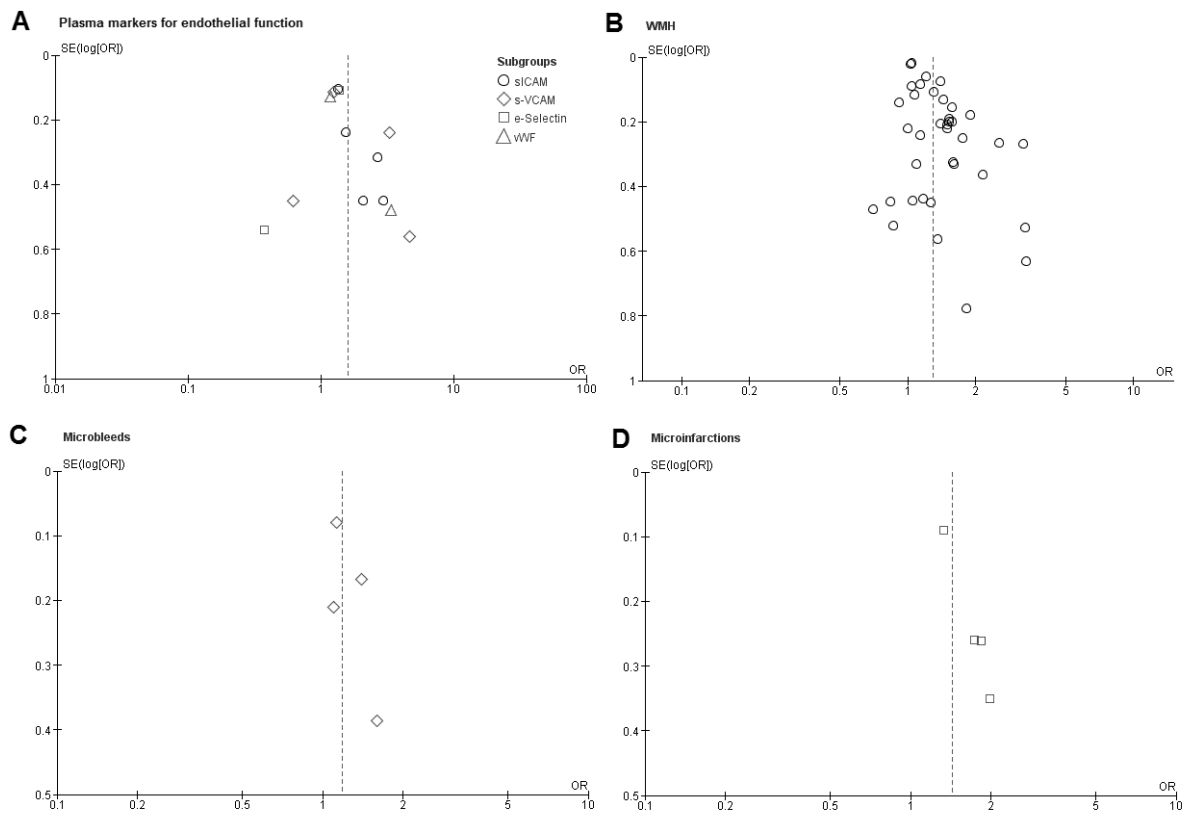

**eFigure 1.** Funnel Plot of Cross-Sectional Studies on the Association Between Microvascular Dysfunction and Depression; Plasma Markers for Endothelial Function (A), WMH (B), Microbleeds (C) And Microinfarctions (D)

## Cerebral microbleeds

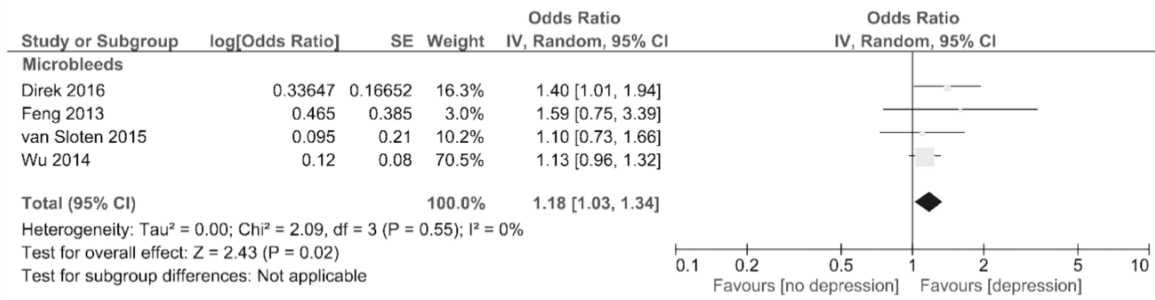

**eFigure 2.** Forest Plots With the Odds Ratios and 95% Confidence Intervals for Original Studies and the Pooled Odds Ratios for the Cross-Sectional Association Between Cerebral Microbleeds and Depression

These data represent the odds to have a clinically relevant depression, per standard deviation higher number of cerebral microbleeds.

## Cerebral (micro)infarctions

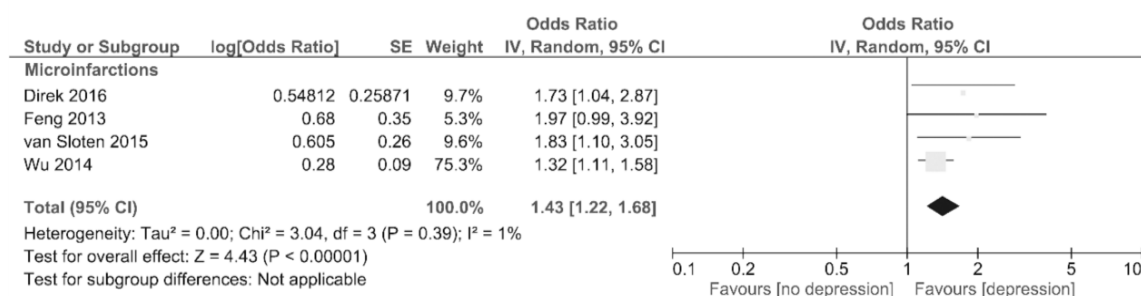

**eFigure 3.** Forest Plots With the Odds Ratios and 95% Confidence Intervals for Original Studies and the Pooled Odds Ratios for the Cross-Sectional Association Between Cerebral (Micro)Infarctions and Depression

These data represent the odds to have a clinically relevant depression, per standard deviation higher number of cerebral (micro)infarctions.

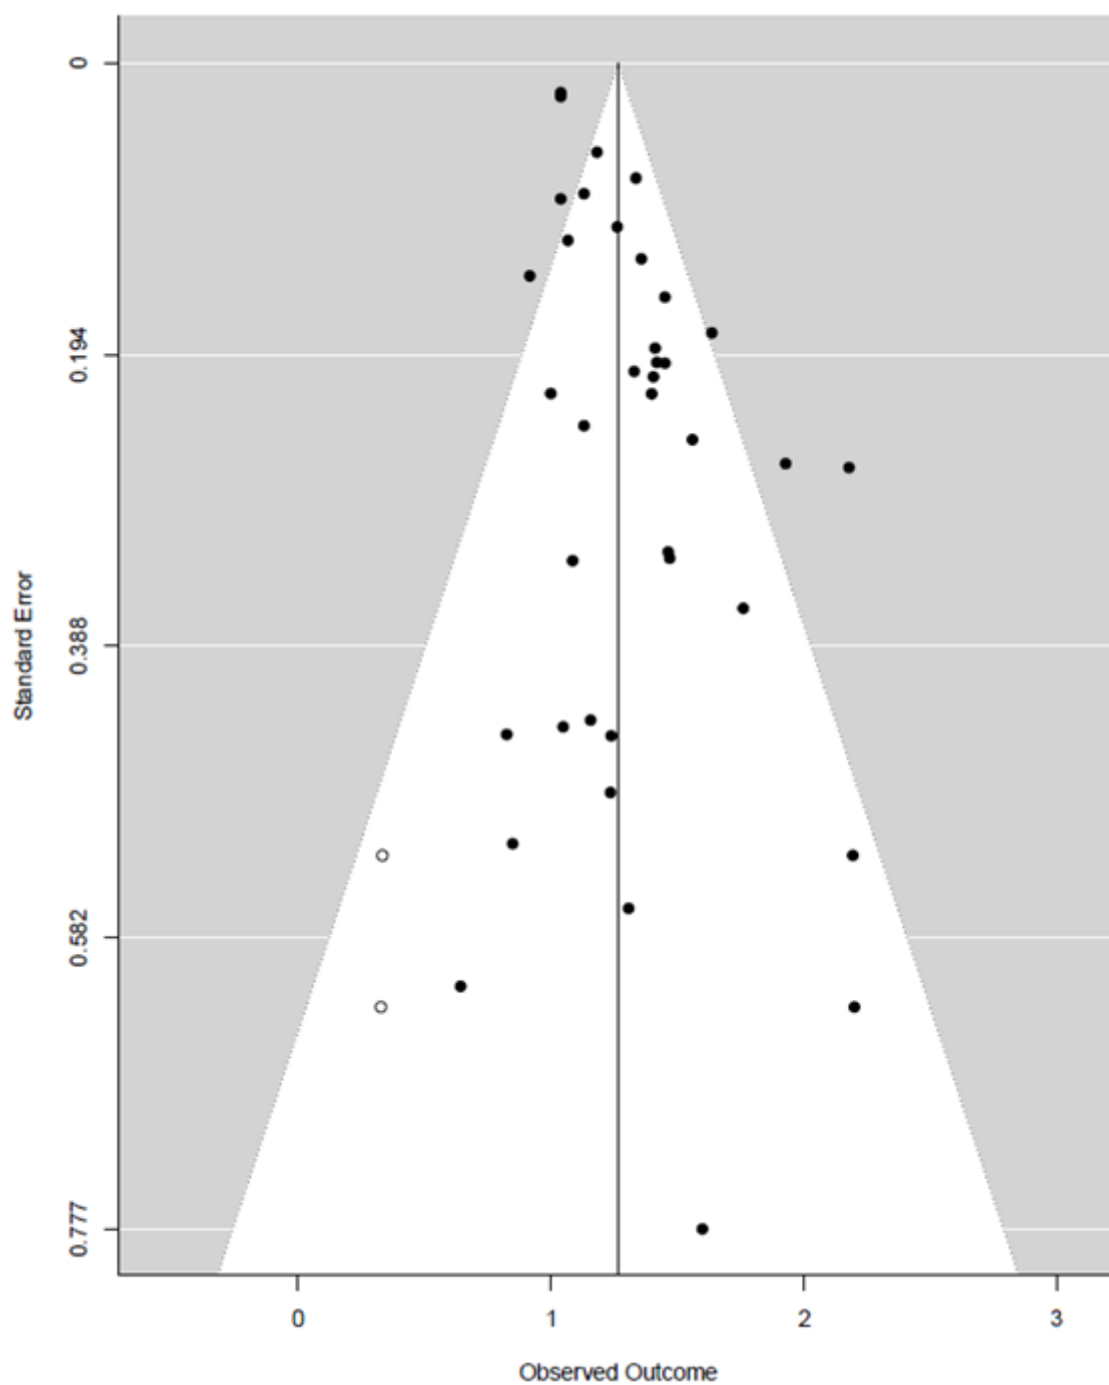

**eFigure 4.** Funnel Plot of Cross-Sectional Studies on the Association Between White Matter Hyperintensities and Depression After Trim-and-Fill Analysis

Two theoretical and 38 original studies are indicated with white and black circles, respectively.

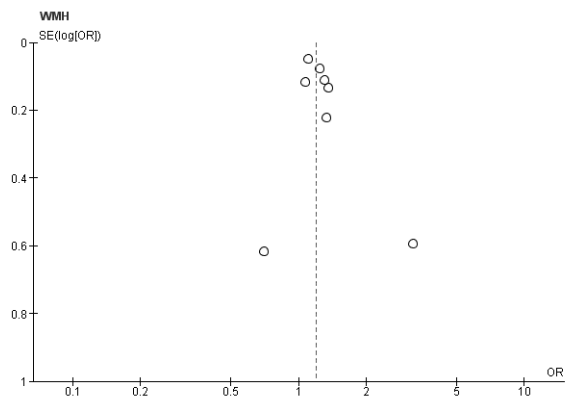

**eFigure 5.** Funnel Plot of Longitudinal Studies on the Association Between Cerebral Small Vessel Disease and Depression

**eTable 1.** Quality Assessment of the Included Studies by Use Of the Newcastle-Ottawa Scale (NOS)

| Study                                                | Study design                                        | Selection   | Comparability | Exposure (c-c only) | Outcome (cohort only) | Overall assessment | Percentage of maximum score |
|------------------------------------------------------|-----------------------------------------------------|-------------|---------------|---------------------|-----------------------|--------------------|-----------------------------|
| <b><i>Plasma markers of endothelial function</i></b> |                                                     |             |               |                     |                       |                    |                             |
| Dimopoulos 2006                                      | Case-control                                        | 1, 3, 4     | 1a, 1b        | 1b, 2               |                       | 7/8                | 87.5%                       |
| Lesperance 2004                                      | Case-control                                        | 1, 2, 4     | 1a, 1b        | 1b, 2               |                       | 7/8                | 87.5%                       |
| Phuong Do 2010                                       | Population based cohort                             | 1a, 2, 3    | 1a            |                     | 1a                    | 5/6                | 83.3%                       |
| Rajagopalan 2001                                     | Case-control                                        | 1           |               | 1b                  |                       | 2/8                | 25%                         |
| Tchalla 2015                                         | Population based cohort                             | 1, 2        | 1a, 1b        |                     | 1a                    | 5/6                | 83.3%                       |
| Thomas 2007                                          | Case-control                                        | 3, 4        | 1a            | 1b, 2               |                       | 5/8                | 62.5%                       |
| Tully 2016                                           | Population based cohort                             | 1, 2        |               |                     | 1a                    | 3/6                | 50%                         |
| van Dooren 2016                                      | Population based cohort                             | 1, 2, 3     | 1a, 1b        |                     | 1a                    | 6/6                | 100%                        |
| van Sloten 2013                                      | Population based cohort                             | 1, 2, 3     | 1a, 1b        |                     | 1a                    | 6/6                | 100%                        |
| <b><i>Albuminuria</i></b>                            |                                                     |             |               |                     |                       |                    |                             |
| Fischer 2013                                         | Population-based cohort                             | 1a, 3a      | 1a, 1b        | 1b                  |                       | 5/6                | 83.3%                       |
| Katon 2004                                           | Population-based cohort                             |             | 1a, 1b        | 1a                  |                       | 3/6                | 50%                         |
| <b><i>Retinal diameters</i></b>                      |                                                     |             |               |                     |                       |                    |                             |
| Nguyen 2010                                          | Case-control                                        | 1, 4        | 1a, 1b        | 1b, 2               |                       | 6/8                | 75%                         |
| Ikram 2010                                           | Population based cohort                             | 1, 2, 3b, 4 | 1a, 1b        |                     | 1a, 2                 | 8/9                | 88.9%                       |
| <b><i>Cerebral small vessel disease</i></b>          |                                                     |             |               |                     |                       |                    |                             |
| Aizenstein 2011                                      | Case-control                                        | 1, 4        | 1a            | 1a, 2               |                       | 5/8                | 62.5%                       |
| Almeida 2004                                         | Case-control                                        | 3, 4        | 1a            | 1b, 2a              |                       | 5/8                | 62.5%                       |
| Chatterjee 2010                                      | Case-control                                        | 1, 2        | 1             | 1a, 2               |                       | 5/8                | 62.5%                       |
| Chen 2009                                            | Case-control                                        | 1, 2        | 1a, 1b        | 1a, 2               |                       | 6/8                | 75%                         |
| Colloby 2011                                         | Case-control                                        | 1, 3        | 1a            | 1b, 2a              |                       | 5/8                | 62.5%                       |
| Cyprien 2014                                         | Population-based cohort, prospective (ESPRIT study) | 1, 2, 3b, 4 | 1a, 1b        |                     | 1a, 2                 | 8/9                | 88.9%                       |
| Dalby 2010                                           | Case-control                                        | 1, 2, 3, 4  | 1a, 1b        | 1b, 2a              |                       | 8/8                | 100%                        |



|                  |                                                                              |                |        |        |            |     |       |
|------------------|------------------------------------------------------------------------------|----------------|--------|--------|------------|-----|-------|
| De Groot 2000    | Population-based cohort. Rotterdam scan study.                               | 1a, 2a         | 1a, 1b |        | 1a         | 5/6 | 83.3% |
| Delaloye 2010    | Case-control                                                                 | 1, 4           | 1a, 1b | 1b, 2a |            | 6/8 | 75%   |
| Devantier 2016   | Case-control                                                                 | 1, 3           | 1a     | 1a, 2  |            | 5/8 | 62.5% |
| Direk 2016       | Population-based cohort. Rotterdam study.                                    | 1a, 2a         | 1a, 1b |        | 1a         | 5/6 | 83.3% |
| Dotson 2013      | Population-based cohort, prospective (Baltimore longitudinal study of aging) | 1a, 2a         | 1a, 1b |        | 1a, 2a, 3a | 7/9 | 77.8% |
| Feng 2013        | Population-based cohort                                                      | 1a, 2a         | 1a, 1b |        | 1a         | 5/6 | 83.3% |
| Firbank 2005     | Population-based cohort, prospective (LADIS)                                 | 1a, 2a         | 1a, 1b |        | 1a         | 5/9 | 55.6% |
| Fujishima 2014   | Case-control                                                                 | 1a, 2a, 3a     | 1a     | 1a, 2a |            | 6/8 | 75%   |
| Godin 2008       | Population-based cohort, prospective (3C-Dijon study)                        | 1a, 2a, 3b,    | 1a, 1b |        | 1a, 2      | 7/9 | 77.8% |
| Greenwald 1998   | Case-control                                                                 | 1a, 2a, 3a     |        |        | 1a, 2      | 5/8 | 62.5% |
| Grool 2013       | Population-based cohort, prospective (SMART-Medea)                           | 1a, 2a         | 1a, 1b |        | 1a, 2      | 6/9 | 66.7% |
| Gudmundsson 2013 | Population-based cohort (AGES-Reykjavik study)                               | 1a, 2a, 3b     | 1a, 1b |        | 1a         | 6/6 | 100%  |
| Hannestad 2006   | Case-control                                                                 | 1a, 3a, 4a     | 1a     | 1a, 2  |            | 6/8 | 75%   |
| Iosifescu 2005   | Case-control                                                                 | 1a, 3a, 4a     | 1a, 1b | 1b, 2a |            | 7/8 | 87.5% |
| Janssen 2004     | Case-control                                                                 | 1a, 3a, 4a     | 1a     | 1a, 2  |            | 6/8 | 75%   |
| Janssen 2007     | Case-control                                                                 | 1a, 4a         | 1a     | 1b, 2a |            | 5/8 | 62.5% |
| Jorm 2005        | Population-based cohort                                                      | 1a, 2a         | 1a, 1b |        |            | 4/6 | 66.7% |
| Kieseppa         | Case-                                                                        | 1a, 2a, 3a, 4a | 1a     | 1b, 2a |            | 7/8 | 87.5% |

|                  |                                                                    |                |        |        |        |     |       |
|------------------|--------------------------------------------------------------------|----------------|--------|--------|--------|-----|-------|
| 2013             | control                                                            |                |        |        |        |     |       |
| Kohler 2010      | Case-control                                                       | 1a, 2a, 3a, 4a | 1a     | 1a     |        | 6/8 | 75%   |
| Krishnan 2006    | Population-based cohort (LADIS)                                    | 1a, 2a         | 1a, 1b |        | 1a     | 5/6 | 83.3% |
| Kumar 2000       | Case-control                                                       | 1a, 3a, 4a     | 1a     | 1a, 2a |        | 6/8 | 75%   |
| Lavretsky 2008   | Population-based cohort                                            | 1a, 2a, 3b     | 1a, 1b |        | 1a     | 6/6 | 100%  |
| Lee 2003         | Case-control                                                       | 1a, 2a, 3a     | 1a     | 1b, 2a |        | 6/8 | 75%   |
| Lin 2005         | Case-control                                                       | 2a, 4a         |        | 1a, 2a |        | 4/8 | 50%   |
| MacFall 2005     | Case-control                                                       | 2a, 3a, 4a     | 1a     | 2a     |        | 5/8 | 62.5% |
| Murray 2013      | Population-based cohort, prospective                               | 1a, 2a         | 1a     |        | 1a     | 4/9 | 44.4% |
| Nys 2005         | Case-control                                                       | 2a, 4a         | 1a     | 1a, 2a |        | 5/8 | 62.5% |
| Olesen 2010      | Population-based cohort, prospective                               | 1a, 2a, 3b     | 1a, 1b |        | 1a, 2a | 7/9 | 77.8% |
| Paranthaman 2010 | Case-control                                                       | 1a, 2a         |        | 1b, 2a |        | 4/8 | 50%   |
| Perez 2012       | Population-based cohort (Rotterdam Scan Study)                     | 1a, 2a         | 1a, 1b |        | 1a     | 5/6 | 83.3% |
| Potter 2007      | Population-based cohort                                            | 1a, 2a, 3b     | 1a, 1b |        | 1a     | 6/6 | 100%  |
| Sheline 2008     | Population-based cohort                                            | 1a, 3a         | 1a, 1b | 1b     |        | 5/6 | 83.3% |
| Shimony 2009     | Population-based cohort                                            | 1a, 2a, 3b     | 1a     |        | 1a     | 5/6 | 83.3% |
| Steffens 2002    | Population-based cohort, prospective (Cardiovascular Health Study) | 1a, 2a, 4a     | 1a, 1b |        | 1a, 2a | 7/9 | 77.8% |
| Steffens 1999    | Population-based cohort (Cardiovascular Health Study)              | 1a, 2a         | 1a, 1b |        | 1a     | 5/9 | 55.6% |
| Tang 2010        | Case-control                                                       | 1a, 3a, 4a     | 1a     | 1b, 2a |        | 6/8 | 75%   |
| Taylor 2005      | Case-control                                                       | 2a, 3a, 4a     | 1a, 1b | 1b, 2a |        | 7/8 | 87.5% |
| Taylor 2007      | Case-control                                                       | 1a, 2a, 3a, 4a | 1a     | 1b, 2a |        | 7/8 | 87.5% |

|                 |                                                       |                |        |        |            |     |       |
|-----------------|-------------------------------------------------------|----------------|--------|--------|------------|-----|-------|
| Teodorczuk 2010 | Population-based cohort, prospective (LADIS study)    | 1a, 2a, 4a     | 1a, 1b |        | 1a, 2a     | 7/9 | 77.8% |
| Tudorascu 2014  | Population-based cohort                               | 1a, 2a         | 1a, 1b |        | 1a         | 5/6 | 83.3% |
| Tupler 2002     | Case-control                                          | 1a, 2a, 3a, 4a | 1a     | 1a, 2a |            | 7/8 | 87.5% |
| Van Sloten 2015 | Population-based cohort, prospective (AGES-Reykjavik) | 1a, 2a, 4a     | 1a, 1b |        | 1a, 2a, 3a | 8/9 | 88.9% |
| van Uden 2011   | Population-based cohort, prospective (RUN DMC study)  | 2a, 3a         | 1a     | 1a     |            | 4/9 | 44.4% |
| Vardi 2010      | Case-control                                          | 1a, 4a         |        | 1a, 2a |            | 4/8 | 50%   |
| Vataja 2001     | Case-control                                          | 1a, 2a, 3a, 4a |        | 1a, 2a |            | 6/8 | 75%   |
| Versluis 2006   | Population-based cohort (Prosper study)               | 1a, 2a         | 1a     |        | 1a, 2a     | 5/6 | 83.3% |
| Videbech 2000   | Case-control                                          | 1a, 2a, 3a, 4a | 1a     | 1b, 2a |            | 7/8 | 87.5% |
| Wu 2014         | Case-control                                          | 1a, 3a, 4a     | 1a     | 1a, 2a |            | 7/8 | 87.5% |

**eTable 2.** Characteristics of Studies Included in the Systematic Review and Meta-Analysis

| Study                                                                | Study design                                                 | Characteristics of study population                     | Age (yrs) | Sex (%F) | Participants (n) | Participants with depression (n) | Microcirculation marker             | Definition of depression          |
|----------------------------------------------------------------------|--------------------------------------------------------------|---------------------------------------------------------|-----------|----------|------------------|----------------------------------|-------------------------------------|-----------------------------------|
| <i>Plasma markers of endothelial function (Cross-sectional data)</i> |                                                              |                                                         |           |          |                  |                                  |                                     |                                   |
| Dimopoulos 2006                                                      | Case-control                                                 | Greece, general population                              | 60+       | 61       | 66               | 33                               | sICAM-1; s-VCAM-1                   | GDS, diagnostic interview         |
| Lesperance 2004                                                      | Case-control                                                 | Canada, consecutive patients coronary syndrome          | 57        | 19       | 481              | 35                               | sICAM-1                             | SCID                              |
| Phuong Do 2010                                                       | Population based cohort                                      | USA, general population                                 | 43        | 35       | 434              | 103                              | sICAM-1; sE-Selectin                | 11 item CES-D $\geq$ 16           |
| Tchalla 2015                                                         | Population based cohort (MOBILIZE Boston study)              | USA, general population                                 | 78        | 63       | 668              | 179                              | sICAM-1, sVCAM-1                    | CES-D $\geq$ 16                   |
| Thomas 2007                                                          | Case-control                                                 | UK, general population                                  | 75        | 60       | 48               | 23                               | sICAM-1; sVCAM-1                    | GDS, MDRS, DSM-IV                 |
| Tully 2016                                                           | Population based cohort (Floreys Adelaide Male ageing study) | Australia, general population                           | 53        | 0        | 688              | 59                               | sE-Selectin                         | BDI                               |
| van Dooren 2016                                                      | Population based cohort (The Maastricht Study)               | the Netherlands, general population                     | 60        | 45       | 852              | 55                               | sICAM-1, s-VCAM-1, sE-Selectin, vWF | PHQ-9, MINI                       |
| van Sloten 2014                                                      | Population based cohort (The Hoorn Study)                    | the Netherlands, general population                     | 70        | 50       | 493              | 63                               | sICAM-1; s-VCAM-1; sE-Selectin vWF  | 20 item CES-D $\geq$ 16           |
| <i>Albuminuria (Cross-sectional data)</i>                            |                                                              |                                                         |           |          |                  |                                  |                                     |                                   |
| Fischer 2012                                                         | Population-based cohort                                      | USA, Hispanic and non-Hispanic CKD patients             | 58        | 43       | 3853             | 1098                             | ACR                                 | BDI                               |
| Katon 2004                                                           | Population-based cohort                                      | USA, primary care patients with predominantly diabetics | 60        | 49       | 557              | 78                               | Micro-albuminuria in spot urine     | PHQ-9                             |
| <i>Retinal vessel diameters (Cross-sectional data)</i>               |                                                              |                                                         |           |          |                  |                                  |                                     |                                   |
| Nguyen 2010                                                          | Case-control                                                 | USA, Caucasian and African Americans, mean age 70       | 70        | 77       | 146              | 43                               | Arteriolar and venular diameters    | HDRS, DSM-IV                      |
| <i>Retinal vessel diameters (Longitudinal data)</i>                  |                                                              |                                                         |           |          |                  |                                  |                                     |                                   |
| Ikram 2010                                                           | Population based cohort, prospective (Rotterdam Scan study)  | the Netherlands, general population, 9 years follow-up  | 66        | 55       | 3605             | 555                              | Arteriolar and venular diameters    | CES-D, HADS, diagnostic interview |
| <i>Cerebral Small Vessel Disease (Cross-sectional data)</i>          |                                                              |                                                         |           |          |                  |                                  |                                     |                                   |
| Aizenstein 2011                                                      | Case-control                                                 | Caucasian and African Americans                         | 70        | 67       | 60               | 33                               | WMH volumetry (semi-automatic)      | HDRS                              |
| Almeida 2004                                                         | Case-control                                                 | South America, heart failure                            | 74        | 53       | 32               | 8                                | Scheltens scale                     | HDRS                              |
| Chatterjee 2010                                                      | Case-control                                                 | UK, stroke population                                   | 70        | 40       | 103              | 33                               | CT scan WMH rating scale            | Diagnostic interview, MDRS        |
| Chen 2009                                                            | Case-control                                                 | China, stroke population                                | 65        | 75       | 127              | 44                               | WMH volumetry (semi-automatic)      | GDS                               |
| Colloby 2011                                                         | Case-control                                                 | UK, general population                                  | 74        | 69       | 68               | 38                               | WMH volumetry (semi-automatic)      | GDS, MDRS, diagnostic             |

|                  |                                                     |                                                                                                            |       |               |      |      |                                                                   |                                                                       |
|------------------|-----------------------------------------------------|------------------------------------------------------------------------------------------------------------|-------|---------------|------|------|-------------------------------------------------------------------|-----------------------------------------------------------------------|
| Cyprien 2014     | Population-based cohort, prospective (ESPRIT study) | France, general population                                                                                 | 71    | 45            | 467  | 120  | WMH volumetry (semi-automatic)                                    | interview<br>MINI 5, CES-D, current anti-depressive treatment         |
| Dalby 2010       | Case-control                                        | Denmark, general population                                                                                | 58    | 68            | 44   | 22   | WMH volumetry (semi-automatic)                                    | Physicians diagnosis                                                  |
| De Groot 2000    | Population-based cohort                             | the Netherlands, general population                                                                        | 72    | 52            | 1077 | 185  | WMH severity rating scale                                         | CES-D, history of depression                                          |
| Delaloye 2010    | Case-control                                        | Switzerland, non-specified population                                                                      | 70    | 73            | 60   | 11   | Scheltens scale                                                   | GDS                                                                   |
| Devantier 2016   | Case-control                                        | Denmark, general population                                                                                | 60    | 15            | 56   | 29   | WMH volumetry (semi-automatic)                                    | Diagnostic interview                                                  |
| Direk 2016       | Population-based cohort (Rotterdam study)           | the Netherlands, general population                                                                        | 59    | 55            | 3799 | 60   | WMH volumetry (semi-automatic)<br>Microbleeds<br>Microinfarctions | CES-D, SCAN diagnostic interview in participants with CES-D $\geq$ 16 |
| Dotson 2013      | Population-based cohort, prospective                | South-America, general population                                                                          | 72    | 43            | 90   | 9    | WMH severity rating scale                                         | 20 item CES-D, history of depression                                  |
| Feng 2013        | Population-based cohort                             | China, general population                                                                                  | 72    | 57            | 85   | 57   | Fazekas scale                                                     | GDS                                                                   |
| Firbank 2005     | Population-based cohort, prospective (LADIS)        | the Netherlands, Denmark, France, Austria, Sweden, Finland, Portugal, Germany, England, general population | 74    | 55            | 629  | 169  | WMH volumetry (semi-automatic)                                    | GDS                                                                   |
| Fujishima 2014   | Case-control                                        | Japan, MCI -/+                                                                                             | 79    | 57            | 322  | 81   | WMH volumetry (semi-automatic)                                    | GDS $\geq$ 5                                                          |
| Greenwald 1998   | Case-control                                        | USA, general population                                                                                    | 75    | 59            | 66   | 35   | Scheltens scale                                                   | HDRS                                                                  |
| Gudmundsson 2013 | Population-based cohort                             | Iceland, general population                                                                                | 75    | 58            | 4296 | 185  | WMH volumetry (semi-automatic)                                    | MINI, GDS                                                             |
| Hannestad 2006   | Case-control                                        | USA, general population                                                                                    | 60+   | 64            | 246  | 182  | WMH volumetry (semi-automatic)                                    | CES-D, MDRS, history of depression                                    |
| Iosifescu 2005   | Case-control                                        | USA, general population                                                                                    | 41    | 34            | 85   | 50   | Fazekas scale                                                     | Modified HDRS                                                         |
| Janssen 2004     | Case-control                                        | the Netherlands, general population                                                                        | 63    | 100           | 69   | 28   | WMH volumetry (semi-automatic)                                    | Diagnostic interview                                                  |
| Janssen 2007     | Case-control                                        | the Netherlands, general population                                                                        | 70    | 67            | 70   | 50   | WMH volumetry (semi-automatic)                                    | MDRS                                                                  |
| Jorm 2005        | Population-based cohort                             | Australia, general population                                                                              | 60-64 | Not described | 475  | 38   | Fazekas scale                                                     | PHQ-9, antidepressant medication                                      |
| Kieseppa 2013    | Case-control                                        | Finland, general population                                                                                | 41    | 55            | 65   | 44   | Coffey scale                                                      | Physicians diagnosis                                                  |
| Kohler 2010      | Case-control                                        | UK, general population                                                                                     | 60+   | 78            | 64   | 35   | Scheltens scale                                                   | MDRS                                                                  |
| Krishnan 2006    | Population-based cohort (LADIS)                     | the Netherlands, Denmark, France, Austria, Sweden, Finland, Portugal, Germany, England, general population | 74    | 55            | 626  | 92   | Scheltens scale                                                   | GDS-15                                                                |
| Kumar 2000       | Case-control                                        | USA, general population                                                                                    | 70    | 73            | 81   | 51   | WMH volumetry (semi-automatic)                                    | SCID DMS-IV, HDRS >15                                                 |
| Lavretsky 2008   | Population-based cohort                             | USA, general population                                                                                    | 74    | 21            | 270  | 49   | WMH volumetry (semi-automatic)                                    | MUDS                                                                  |
| Lee 2003         | Case-control                                        | USA, general population                                                                                    | 60+   | 67            | 82   | 41   | Coffey scale                                                      | HDRS, history of depression                                           |
| Lin 2005         | Case-control                                        | Taiwan, general population                                                                                 | 71    | 64            | 55   | 37   | Fazekas scale                                                     | 17-item HDRS > 15, diagnostic interview                               |
| MacFall 2005     | Case-control                                        | USA, general population                                                                                    | 60+   | 63            | 99   | 50   | WMH volumetry (semi-automatic)                                    | CES-D > 16, history of MDD                                            |
| Murray 2013      | Population-based cohort, prospective                | UK, general population                                                                                     | 64    | 47            | 219  | n.a. | Scheltens scale                                                   | HADS-D                                                                |

|                  |                                                       |                                                 |     |    |      |     |                                    |                                             |
|------------------|-------------------------------------------------------|-------------------------------------------------|-----|----|------|-----|------------------------------------|---------------------------------------------|
| Olesen 2010      | Population-based cohort, prospective                  | Sweden, general population, 5 years follow-up   | 72  | 70 | 525  | 83  | Gothenburg scale                   | HRSD, MDRS, physicians diagnosis            |
| Paranthaman 2010 | Case-control                                          | UK, general population                          | 72  | 65 | 40   | 20  | WMH volumetry (semi-automatic)     | Physicians diagnosis, history of depression |
| Potter 2007      | Case-control                                          | USA, general population                         | 72  | 64 | 130  | 83  | WMH volumetry (semi-automatic)     | MADRS                                       |
| Sheline 2008     | Case-control                                          | USA, depressed inpatients                       | 59+ | 65 | 115  | 83  | WMH volumetry (semi-automatic)     | MDRS, diagnostic interview based on DMS-IV  |
| Steffens 1999    | Population-based cohort (Cardiovascular Health Study) | USA, general population                         | 75  | 58 | 3660 | 880 | WMH severity rating scale          | CES-D score in highest quartile             |
| Tang 2010        | Case-control                                          | China, post-stroke depression                   | 67  | 53 | 156  | 78  | Fazekas scale                      | Diagnostic interview                        |
| Taylor 2005      | Case-control                                          | USA, general population                         | 60+ | 68 | 399  | 253 | WMH volumetry (semi-automatic)     | CES-D, history of depression                |
| Taylor 2007      | Case-control                                          | USA, general population                         | 60+ | 68 | 370  | 226 | WMH volumetry (semi-automatic)     | CES-D, MDRS, history of depression          |
| Tudorascu 2014   | Population-based cohort (Health ABC)                  | USA, general population                         | 83  | 64 | 277  | 63  | WMH volumetry (semi-automatic)     | CES-D                                       |
| Tupler 2002      | Case-control                                          | USA, general population                         | 50+ | 73 | 267  | 115 | Fazekas scale                      | Physicians diagnosis                        |
| van Uden         | Population-based cohort (RUN DMC study)               | the Netherlands, consecutive patients with CSVD | 65  | 44 | 491  | 101 | WMH volumetry (semi-automatic)     | CES-D, antidepressant medication            |
| Vardi 2010       | Case-control                                          | Israel, general population                      | 55  | 54 | 101  | 37  | WMH volumetry (semi-automatic)     | Diagnostic interview                        |
| Vataja 2001      | Case-control                                          | Finland, consecutive stroke patients            | 71  | 51 | 275  | 109 | WMH volumetry (calculated by hand) | Diagnostic interview                        |
| Videbech 2000    | Case-control                                          | Denmark, inpatients                             | 45  | 67 | 137  | 44  | Fazekas scale                      | Diagnostic interview                        |
| Wu 2014          | Case-control                                          | Chinese, general population                     | 72  | 60 | 335  | 65  | Fazekas scale                      | Diagnostic interview                        |

*Cerebral Small Vessel Disease (Longitudinal data)*

|               |                                                                    |                                                               |     |    |      |                    |                                |                                           |
|---------------|--------------------------------------------------------------------|---------------------------------------------------------------|-----|----|------|--------------------|--------------------------------|-------------------------------------------|
| Firbank 2012  | Population-based cohort, prospective (LADIS study)                 | Multicenter, general population, 3 years follow-up            | 64+ | 54 | 639  | 211                | WMH volumetry (semi-automatic) | GDS                                       |
| Godin 2008    | Population-based cohort, prospective (3C-Dijon study)              | France, general population, 4 years follow-up                 | 72  | 61 | 1658 | 241                | WMH volumetry (semi-automatic) | MINI, CESD, antidepressant medication use |
| Grool 2013    | Population-based cohort, prospective (SMART-Medea)                 | Dutch, symptomatic atherosclerotic disease, 3 years follow-up | 62  | 19 | 650  | No cases described | WMH volumetry (semi-automatic) | PHQ-9 quartiles                           |
| Olesen 2010   | Population-based cohort, prospective                               | Sweden, general population, 5 years follow-up                 | 72  | 70 | 525  | 83                 | Gothenburg scale               | HRSD, MDRS, physicians diagnosis          |
| Perez 2012    | Population-based cohort (Rotterdam Scan Study)                     | Dutch, non-demented population, 3.6 years follow-up           | 60+ | 52 | 961  | 92                 | WMH severity rating scale      | CES-D                                     |
| Steffens 2002 | Population-based cohort, prospective (Cardiovascular Health Study) | USA, general population, 4 years follow-up                    | 70  | 40 | 3236 | 1821               | WMH severity rating scale      | Ever CES-D >7                             |
| Teodorczuk    | Population-                                                        | Multicenter, patients                                         | 65+ | 54 | 399  | 85                 | WMH volumetry                  | GDS                                       |

|                        |                                                       |                                                                |    |    |      |     |                                                                   |              |
|------------------------|-------------------------------------------------------|----------------------------------------------------------------|----|----|------|-----|-------------------------------------------------------------------|--------------|
| <b>2010</b>            | based cohort, prospective (LADIS study)               | presenting at neurology department, 3 years follow-up          |    |    |      |     | (semi-automatic)                                                  |              |
| van Sloten <b>2015</b> | Population-based cohort, prospective (AGES-Reykjavik) | Iceland, general population, 4 years follow-up                 | 75 | 57 | 1949 | 197 | WMH volumetry (semi-automatic), microbleeds, subcortical infarcts | GDS          |
| Versluis 2006          | Population-based cohort, prospective (Prosper study)  | the Netherlands, high CVD risk population, 2.8 years follow-up | 75 | 43 | 527  | 43  | WMH volumetry (semi-automatic)                                    | 15 items GDS |

sICAM-1 (Soluble intercellular adhesion molecule-1), s-VCAM-1 (Soluble vascular cell adhesion molecule-1), GDS (Geriatric Depression Scale), SCID (Structured clinical interview for DSM-IV), CES-D (Center for Epidemiological Studies of Depression), DSM-IV (Diagnostic and Statistical Manual of Mental Disorders IV), MDRS (Montgomery-Åsberg Depression Rating Scale), HDRS (Hamilton Rating Scale for Depression), WMH (White matter hyperintensities), PWMH (Periventricular WMH), DWMH (Deep cortical WMH), AWMH (Anterior WMH), MINI (Mini International Neuropsychiatric Interview), MCI (Mild cognitive impairment), PHQ-9 (Patient health questionnaire-9), BDI (Beck Depression Index), CSVD (Cerebral small vessel disease), CVD (Cardiovascular disease), CKD (Chronic kidney disease), ACR (Albumin creatinin ratio)

**eTable 3.** Reported Results of Studies Included in the Systematic Review and Meta-analysis

| Study                                                  | Marker              | Results                                                 | Calculated results    | Transformation | Adjustments for covariates                                                                                                                                                                                         |
|--------------------------------------------------------|---------------------|---------------------------------------------------------|-----------------------|----------------|--------------------------------------------------------------------------------------------------------------------------------------------------------------------------------------------------------------------|
| <i>Endothelial dysfunction (Cross-sectional data)</i>  |                     |                                                         |                       |                |                                                                                                                                                                                                                    |
| Dimopoulos 2006                                        | sICAM-1             | OR 2.97 [1.23 – 7.18]                                   | NA                    | None           | Sex, smoking, metabolic syndrome                                                                                                                                                                                   |
|                                                        | sVCAM-1             | OR 4.66 [1.55 – 13.98]                                  | NA                    |                |                                                                                                                                                                                                                    |
| Lesperance 2004                                        | sICAM-1             | Depression: 5.34±0.24<br>Control: 5.20±0.26             | OR 2.66 [1.43 – 4.96] | SMD*           | Sex, smoking, metabolic syndrome                                                                                                                                                                                   |
| Phuong Do 2010                                         | sICAM-1             | % change: 17.6                                          | NA                    | None           | Age, sex, systolic blood pressure, cardiovascular condition, inflammation, BMI, smoking status                                                                                                                     |
|                                                        | E-Selectin          | % change: 17.96                                         | NA                    |                |                                                                                                                                                                                                                    |
| Tchalla 2015                                           | sICAM-1             | Depression: 273±87<br>Control: 258±75                   | OR 1.41 [1.04 – 1.92] | SMD*           | None                                                                                                                                                                                                               |
|                                                        | sVCAM-1             | OR 1.97 [1.14 – 3.57]                                   | NA                    | None           | Age, sex, race, educational level, BMI, smoking, alcohol use, physical activity, diabetes, comorbidity index                                                                                                       |
| Thomas 2007                                            | sICAM-1             | Depression: 289.0<br>Control: 251.6                     | OR 2.08 [0.86 – 5.01] | SMD            | None                                                                                                                                                                                                               |
|                                                        | sVCAM-1             |                                                         | OR 0.61 [0.25 – 1.48] |                |                                                                                                                                                                                                                    |
| Tully 2016                                             | sE-Selectin         | Depression: 3.475<br>Control: 3.469<br>(Logtransformed) | OR 1.11 [0.68 – 1.82] | SMD*           | None                                                                                                                                                                                                               |
| van Dooren 2016                                        | sICAM-1             | Depression: 284.9±71.9<br>Control: 256.7±67.4           | OR 1.35 [1.10 – 1.65] | SMD*           | Age, sex, T2DM, eGFR, history of CVD, smoking, alcohol use, BMI                                                                                                                                                    |
|                                                        | sVCAM-1             | Depression: 428.5±99.3<br>Control: 402.4±101.0          | OR 1.25 [0.99 – 1.58] | SMD*           |                                                                                                                                                                                                                    |
|                                                        | E-Selectin          | Depression: 16.5±10.3<br>Control: 13.2±7.4              | OR 1.36 [1.11 – 1.66] | SMD*           |                                                                                                                                                                                                                    |
|                                                        | vWF                 | Depression: 143.1±44.8<br>Control: 134.3±47.8           | OR 1.19 [0.93 – 1.53] | SMD*           |                                                                                                                                                                                                                    |
| van Sloten 2013*                                       | sICAM-1             | Depression: 257.9±36.5<br>Control: 248.8±37.5           | OR 1.55 [0.96 – 2.49] | SMD*           | Age, sex, glucose metabolism status, prior CVD, hypertension, waist-to-hip ratio, cholesterol, education, physical activity, dietary habits, use of antihypertensive, lipid-lowering, glucose-modifying medication |
|                                                        | sVCAM-1             | Depression: 427.0±59.1<br>Control: 390.6±55.8           | OR 3.25 [2.03 – 5.21] | SMD*           |                                                                                                                                                                                                                    |
|                                                        | E-Selectin          | Depression: 16.6±2.3<br>Control: 17.9±2.4               | OR 0.38 [0.13 – 1.08] | SMD*           |                                                                                                                                                                                                                    |
|                                                        | vWF                 | Depression: 177.4±19.2<br>Control: 146.5±16.3           | OR 1.21 [1.31 – 8.59] | SMD*           |                                                                                                                                                                                                                    |
| <i>Albuminuria (Cross-sectional data)</i>              |                     |                                                         |                       |                |                                                                                                                                                                                                                    |
| Fischer 2013                                           | ACR                 | OR 1.07 [0.90 – 1.26]                                   | NA                    | None           | Age, sex, race, education, hypertension, cholesterol, CVD, diabetes, obesity, eGFR, antidepressant medication                                                                                                      |
| Katon 2004                                             | Microalbuminuria    | OR 1.29 [0.96 – 1.73]                                   | NA                    | None           | Smoking, obesity, exercise, triglycerides, LDL, Hb1Ac, hypertension                                                                                                                                                |
| <i>Retinal vessel diameters (Cross-sectional data)</i> |                     |                                                         |                       |                |                                                                                                                                                                                                                    |
| Nguyen 2010                                            | Arteriolar diameter | OR 8.3 [4.70 – 11.99]                                   | NA                    | None           | Age, sex, duration of diabetes, systolic blood pressure, cigarette smoking, serum glucose, cerebrovascular risk factor scale, cumulative illness scale, retinopathy                                                |
|                                                        | Venular diameter    | OR 2.18 [0.00 – 7.20]                                   | NA                    | None           |                                                                                                                                                                                                                    |
| <i>Retinal vessel diameters (Longitudinal data)</i>    |                     |                                                         |                       |                |                                                                                                                                                                                                                    |
| Ikram 2010                                             | Arteriolar diameter | HR 1.01 [0.93 – 1.10]                                   | NA                    | None           | Age, sex, smoking, blood pressure, diabetes mellitus, BMI, carotid artery plaques, cholesterol                                                                                                                     |
|                                                        | Venular             | HR 1.02 [0.94 – 1.12]                                   | NA                    | None           |                                                                                                                                                                                                                    |



|                                                             | diameter                     |                                                                               |                        |      |                                                                                                                                                                |
|-------------------------------------------------------------|------------------------------|-------------------------------------------------------------------------------|------------------------|------|----------------------------------------------------------------------------------------------------------------------------------------------------------------|
| <i>Cerebral Small Vessel Disease (Cross-sectional data)</i> |                              |                                                                               |                        |      |                                                                                                                                                                |
| Aizenstein 2011                                             | WMH rating scale             | Depression: 0.0015<br>Control: 0.0008                                         | NA                     | None | Age, sex                                                                                                                                                       |
| Almeida 2004                                                | Scheltens scale              | correlation coefficient 0.79                                                  | NA                     | None | Age, sex                                                                                                                                                       |
| Chatterjee 2010                                             | WMH Volumetry                | OR 1.50 [0.97 – 2.20]                                                         | NA                     | None | None                                                                                                                                                           |
| Chen 2009                                                   | Fazekas scale                | Depression: 1.23±0.83<br>Control: 1.19±0.85                                   | OR 1.09 [0.57 – 2.09]  | SMD  | None                                                                                                                                                           |
| Colloby 2011                                                | WMH Volumetry                | Depression: 0.94±1.28<br>Control: 0.84±0.88                                   | OR 1.17 [0.50 – 2.78]  | SMD  | Age, sex                                                                                                                                                       |
| Cyprien 2014                                                | WMH Volumetry                | Depression: 0.59±0.26<br>Control: 0.53±0.26                                   | OR 1.52 [1.03 – 2.25]  | SMD* | Age, education, global cognitive impairment, ischaemic pathologies, left-handedness, ICV, past depression                                                      |
| De Groot 2000                                               | PWMH rating scale            | OR 3.3 [1.20 – 9.50]                                                          | NA                     | None | Age, sex, educational level                                                                                                                                    |
| Delaloye 2010                                               | Scheltens scale DWMH         | Depression: 6.45±6.3<br>Control: 2.87±4.99                                    | OR 3.32 [0.97 – 11.41] | SMD  | None                                                                                                                                                           |
| Devantier 2016                                              | WMH Volumetry                | Depression: 1249±9018<br>Control: 308±4479                                    | OR 1.27 [0.49 – 3.28]  | SMD  | Age, sex, smoking status                                                                                                                                       |
| Direk 2016                                                  | WMH Volumetry                | OR 1.40 [1.20 – 1.62]                                                         | NA                     | None | Age, sex, education, smoking status, hypertension, diabetes mellitus, BMI, total and HDL cholesterol, cognitive function                                       |
|                                                             | Microbleeds                  | OR 1.40 [1.01 – 1.94]                                                         | NA                     | None |                                                                                                                                                                |
|                                                             | Micro-infarctions            | OR 1.73 [1.07 – 2.95]                                                         | NA                     | None |                                                                                                                                                                |
| Dotson 2013                                                 | WMH rating scale             | Regression coefficients<br>-0.06 [0.57] (women)<br>-0.27 [0.42] (men)         | NA                     | None | None                                                                                                                                                           |
| Feng 2013                                                   | PWMH Fazekas scale           | OR 1.14 [0.71 – 1.83]                                                         | NA                     | None | Age, sex, education, hypertension, diabetes, cognition                                                                                                         |
|                                                             | DWMH Fazekas scale           | OR 1.87 [1.13 – 3.08]                                                         | NA                     | None |                                                                                                                                                                |
|                                                             | Microbleeds                  | OR 1.59 [0.75 – 3.38]                                                         | NA                     | None |                                                                                                                                                                |
|                                                             | Micro-infarctions            | OR 1.98 [1.00 – 3.92]                                                         | NA                     | None |                                                                                                                                                                |
| Firbank 2005                                                | WMH Volumetry                | OR 1.52 [1.05 – 2.22]                                                         | NA                     | None | Age, sex, cognition, disability, baseline depression, study center, baseline WMH (longitudinal data only)                                                      |
| Firbank 2012                                                | WMH Volumetry                | Spearman's rho 0.48                                                           | NA                     | None | Age, sex, cognition, disability, baseline depression, study center, baseline WMH                                                                               |
| Fujishima 2014                                              | WMH Volumetry                | Depression: 2.35±0.48<br>Control: 1.29±0.53                                   | OR 3.25 [1.92 – 5.52]  | SMD  | None                                                                                                                                                           |
| Godin 2008                                                  | WMH Volumetry                | Depression: 7.6±0.54<br>Control: 6.8±0.50                                     | OR 1.30 [1.05 – 1.61]  | SMD* | Age, sex, hypertension, history of cardiovascular disease, alcohol and tobacco consumption, physical impairment, brain white matter volume                     |
| Greenwald 1998                                              | Sum of DWMH, Scheltens scale | Depression: 1.53±1.82<br>Control: 0.72±1.24                                   | OR 1.57 [1.16 – 2.13]  | SMD* | Sex, hypertension                                                                                                                                              |
| Grool 2011                                                  | WMH Volumetry                | RR 1.07 [0.85 – 1.35]                                                         | NA                     | None | Age, sex, education, hypertension, diabetes mellitus, physical functioning                                                                                     |
| Gudmundsson 2013                                            | WMH Volumetry                | Depression: 0.9±0.3<br>Control: 0.9±0.4                                       | OR 0.92 [0.70 – 1.21]  | SMD* | Age, sex, years of follow up, ICV, height, education, systolic and diastolic blood pressure, anti-hypertensive medication use                                  |
| Hannestad 2006                                              | WMH Volumetry                | Depression: 6.68±10.1<br>Control: 3.88±3.8                                    | OR 1.75 [1.07 – 2.86]  | SMD* | Age, sex, ICV                                                                                                                                                  |
| Iosifescu 2005                                              | Fazekas scale                | Depression: 0.67±0.66<br>Control: 0.65±0.59                                   | OR 1.05 [0.44 – 2.50]  | SMD* | Age, sex, hypertension, family history of CVD, smoking, diabetes, hypercholesterolemia                                                                         |
| Janssen 2004                                                | WMH Volumetry                | Depression: 6.93±7.89<br>Control: 14.15±11.38                                 | OR 0.84 [0.35 – 2.02]  | SMD  | Age, sex                                                                                                                                                       |
| Janssen 2007                                                | Larger DWMH Volumetry        | Depression: 47%<br>Control: 5%                                                | NA                     | None | Age, cognition, ICV                                                                                                                                            |
| Jorm 2005                                                   | Fazekas scale                | OR 1.39 [0.93 – 2.08]                                                         | NA                     | None | Age, sex, education, physical disability, history of stroke, diabetes, hypothyroidism, cognition, systolic and diastolic blood pressure, smoking, alcohol use. |
| Kieseppa 2014                                               | DWMH Coffey scale            | Depression: 1.13±1.15<br>Control: 0.62±0.97 (obtained through correspondence) | OR 1.59 [0.84 – 3.01]  | SMD  | Age, sex                                                                                                                                                       |

|                  |                                          |                                                               |                          |      |                                                                                                                                                                                 |
|------------------|------------------------------------------|---------------------------------------------------------------|--------------------------|------|---------------------------------------------------------------------------------------------------------------------------------------------------------------------------------|
| Kohler 2010      | Scheltens scale                          | Depression: 12.2±5.4<br>Control: 13.2±9.9                     | OR 1.27<br>[0.53 – 3.06] | SMD* | Age, sex, education                                                                                                                                                             |
| Krishnan 2006    | Scheltens scale                          | OR 1.04 [1.00 – 1.08]                                         | NA                       | None | Age, cognition, hypertension, prior CVD                                                                                                                                         |
| Kumar 2000       | WMH<br>Volumetry                         | Depression:<br>0.00330±0.00460<br>Control:<br>0.00037±0.00054 | OR 1.43<br>[1.11 – 1.85] | SMD  | Age, sex, ICV                                                                                                                                                                   |
| Lavretsky 2008   | WMH<br>volumetry<br>(semi-<br>automatic) | OR 1.14 [0.96 – 1.35]                                         | NA                       | None | Age, sex, education                                                                                                                                                             |
| Lee 2003         | Coffey scale<br>DWMH grade 3             | Depression: n=9<br>Control: n=13                              | NA                       | None | Age, sex, ICV                                                                                                                                                                   |
| Lin 2005         | Fazekas scale                            | Depression: 2.57±1.44<br>Control: 1.67±1.14                   | OR 1.20<br>[1.07 – 1.35] | SMD  | None                                                                                                                                                                            |
| MacFall 2005     | WMH<br>Volumetry                         | Depression: 6.11±0.90<br>Control: 3.09±1.02                   | OR 5.66<br>[4.57 – 6.73] | SMD  | Age, sex                                                                                                                                                                        |
| Murray 2013      | Scheltens scale                          | Pearson correlation<br>coefficient 0.066                      | NA                       | None | Sex, living alone                                                                                                                                                               |
| Paranthaman 2010 | WMH<br>Volumetry                         | Depression:<br>342.2±748.1<br>Control:<br>202.0±881.2         | OR 1.36<br>[0.45 – 4.10] | SMD  | None                                                                                                                                                                            |
| Perez 2012       | WMH rating<br>scale                      | OR 1.10 [1.00 – 1.22]                                         | NA                       | None | Age, sex, education, cognition                                                                                                                                                  |
| Potter 2007      | AWMH<br>Volumetry                        | Depression:<br>0.094±0.026<br>Control:<br>0.063±0.186         | OR 1.60<br>[0.84 – 3.05] | SMD* | Age, education, depression severity, anxiety, time<br>between MRI and depression screening                                                                                      |
| Sheline 2008     | WMH<br>Volumetry                         | Graphic<br>representation of<br>regional differences          | NA                       | None | None                                                                                                                                                                            |
| Steffens 2002    | WMH rating<br>scale                      | OR 1.33 [0.86 – 2.06]                                         | NA                       | None | Age, sex, race, education, antidepressant medication<br>use, cognition, hypertension, coronary heart disease,<br>apoE genotype, ADL, LADL                                       |
| Steffens 1999    | WMH rating<br>scale                      | OR 1.04 [0.99 – 1.08]                                         | NA                       | None | Age, sex, race, education, antidepressant medication<br>use, cognition, hypertension, coronary heart disease,<br>apoE genotype, ADL, LADL                                       |
| Tang 2010        | DWMH Fazekas<br>scale                    | OR 13.8 [1.64 –<br>115.65]                                    | NA                       | None | Age, sex                                                                                                                                                                        |
| Tang 2014        | Pontine<br>Microbleeds<br>rating scale   | OR 2.2 [1.16 – 4.16]                                          | NA                       | None | None                                                                                                                                                                            |
| Taylor 2005      | WMH<br>Volumetry                         | Depression:<br>7.22±10.71<br>Control: 4.87±6.47               | OR 1.57<br>[1.06 – 2.32] | SMD* | Age, sex, race, hypertension, diabetes, heart disease                                                                                                                           |
| Tudorascu 2014   | WMH<br>Volumetry                         | OR 1.89 [1.33 – 2.69]                                         | NA                       | None | Age, sex, cognition, cardiovascular disease, diabetes,<br>hypertension                                                                                                          |
| Tupler 2002      | Sum of Fazekas<br>scale                  | Depression: 3.65±7.05<br>Control: 1.16±2.43                   | OR 2.14<br>[1.05 – 4.36] | SMD  | Age                                                                                                                                                                             |
| van Sloten 2015  | WMH<br>Volumetry                         | OR 1.04 [0.89 – 1.21]                                         | NA                       | None | Age, sex, education, smoking history, alcohol intake,<br>anxiety, gait speed, hypertension, antihypertensive<br>medication, BMI, diabetes, coronary calcium score,<br>cognition |
|                  | Microbleeds<br>rating scale              | OR 1.15 [0.77 – 1.72]                                         | NA                       | None |                                                                                                                                                                                 |
| van Uden 2011    | WMH<br>Volumetry                         | Depression: 21.8±20.2<br>Control: 14.7±13.8                   | OR 1.49<br>[0.97 – 2.29] | SMD  | Age, sex, ICV, lacunar infarcts, amygdala volume                                                                                                                                |
| Vardi 2010       | WMH<br>Volumetry                         | Depression:<br>366.96±1072<br>Control: 54.7±57                | OR 1.82<br>[0.40 – 8.34] | SMD  | None                                                                                                                                                                            |
| Vataja 2001      | WMH Fazekas                              | Depression: 3.4±1.5<br>Control: 3.4±1.6                       | OR 1.00<br>[0.65 – 1.54] | SMD  | None                                                                                                                                                                            |
| Versluis 2006    | WMH<br>Volumetry                         | OR 0.70 [0.28 – 1.76]                                         | NA                       | None | Age, sex                                                                                                                                                                        |
| Videbech 2000    | Fazekas scale                            | OR 0.86 [0.31 – 2.38]                                         | NA                       | None | Age, sex                                                                                                                                                                        |
| Wu 2014          | Fazekas scale                            | Depression: 1.62±1.10<br>Control: 1.11±0.97                   | OR 2.53<br>[1.50 – 4.27] | SMD* | Sex, cognition, microbleeds, microinfarctions                                                                                                                                   |

*Cerebral Small Vessel Disease (Longitudinal data)*

|                 |                          |                                                    |                          |      |                                                                                                                                                                        |
|-----------------|--------------------------|----------------------------------------------------|--------------------------|------|------------------------------------------------------------------------------------------------------------------------------------------------------------------------|
| Firbank 2012    | WMH Volumetry            | Depression: 2 (IQR 1 – 4)<br>Control: 1 (IQR 0 -3) | NA                       | None | Age, sex, cognition, disability, baseline depression, study centre, baseline WMH                                                                                       |
| Godin 2008      | WMH Volumetry            | Depression: 2.1±0.35<br>Control: 1.5±0.31          | OR 1.30<br>[1.05 – 1.62] | SMD* | Age, sex, hypertension, history of CVD, alcohol consumption, smoking, education, diabetes                                                                              |
| Grool 2011      | PWMH Volumetry           | OR 1.07 [0.93 – 1.24]                              | NA                       | None | Age, sex, education, vascular risk, cognition                                                                                                                          |
| Olesen 2010     | Gothenburg scale         | OR 3.21 [1.00 – 10.26]                             | NA                       | None | Age, sex, hypertension, cholesterol                                                                                                                                    |
| Perez 2012      | WMH rating scale         | OR 1.10 [1.00 – 1.22]                              | NA                       | None | Age, sex, education, cognition                                                                                                                                         |
| Steffens 2002   | WMH rating scale         | OR 1.33 [0.86 – 2.06]                              | NA                       | None | Age, sex, race, education, antidepressant medication use, cognition, hypertension, coronary heart disease, apoE genotype, ADL                                          |
| Teodorczuk 2010 | WMH Volumetry            | OR 1.36 [1.04 – 1.76]                              | NA                       | None | Age, sex, educational level, history of depression, cognition, history of stroke, hypertension                                                                         |
| van Sloten 2015 | WMH Volumetry            | OR 1.24 [1.06 – 1.44]                              | NA                       | None | Age, sex, education, smoking history, alcohol intake, anxiety, gait speed, hypertension, antihypertensive medication, BMI, diabetes, coronary calcium score, cognition |
|                 | Microbleeds rating scale | OR 1.36 [0.98 – 1.86]                              | NA                       | None |                                                                                                                                                                        |
| Versluis 2006   | WMH Volumetry            | OR 0.70 [0.21 – 2.34]                              | NA                       | None | Age, sex                                                                                                                                                               |

sICAM-1 (Soluble intercellular adhesion molecule-1), s-VCAM-1 (Soluble vascular cell adhesion molecule-1), GDS (Geriatric Depression Scale), SCID (Structured clinical interview for DSM-IV), CES-D (Center for Epidemiological Studies of Depression), DSM-IV (Diagnostic and Statistical Manual of Mental Disorders IV), MDRS (Montgomery-Åsberg Depression Rating Scale), HDRS (Hamilton Rating Scale for Depression), WMH (White matter hyperintensities), PWMH (Periventricular WMH), DWMH (Deep cortical WMH), AWMH (Anterior WMH), MINI (Mini International Neuropsychiatric Interview), MCI (Mild cognitive impairment), PHQ-9 (Patient health questionnaire-9), BDI (Beck Depression Index), CSVD (Cerebral small vessel disease), CVD (Cardiovascular disease), CKD (Chronic kidney disease), ACR (Albumin creatinin ratio), SMD (Standardized Mean Difference), NA (not applicable): the original data were used.

\* The unadjusted data were used and converted to odds ratios by use of the SMD. Odds ratios were calculated by use of the following formula:  $SMD = (\sqrt{3})/\pi \ln OR$

## eReferences.

1. Dimopoulos N, Piperi C, Salonicioti A, et al. Elevation of plasma concentration of adhesion molecules in late-life depression. *International journal of geriatric psychiatry*. 2006;21(10):965-971.
2. Lesperance F, Frasura-Smith N, Theroux P, Irwin M. The association between major depression and levels of soluble intercellular adhesion molecule 1, interleukin-6, and C-reactive protein in patients with recent acute coronary syndromes. *Am J Psychiatry*. 2004;161(2):271-277.
3. Do DP, Dowd JB, Ranjit N, House JS, Kaplan GA. Hopelessness, depression, and early markers of endothelial dysfunction in U.S. adults. *Psychosomatic medicine*. 2010;72(7):613-619.
4. Tchalla AE, Wellenius GA, Sorond FA, Trivison TG, Dantoine T, Lipsitz LA. Elevated circulating vascular cell Adhesion Molecule-1 (sVCAM-1) is associated with concurrent depressive symptoms and cerebral white matter Hyperintensities in older adults. *BMC geriatrics*. 2015;15:62.
5. Thomas AJ, Morris C, Davis S, Jackson E, Harrison R, O'Brien JT. Soluble cell adhesion molecules in late-life depression. *International psychogeriatrics / IPA*. 2007;19(5):914-920.
6. Tully PJ, Baumeister H, Martin S, et al. Elucidating the Biological Mechanisms Linking Depressive Symptoms With Type 2 Diabetes in Men: The Longitudinal Effects of Inflammation, Microvascular Dysfunction, and Testosterone. *Psychosomatic medicine*. 2016;78(2):221-232.
7. van Dooren FE, Schram MT, Schalkwijk CG, et al. Associations of low grade inflammation and endothelial dysfunction with depression - The Maastricht Study. *Brain, behavior, and immunity*. 2016.
8. van Sloten TT, Schram MT, Adriaanse MC, et al. Endothelial dysfunction is associated with a greater depressive symptom score in a general elderly population: the Hoorn Study. *Psychological medicine*. 2014;44(7):1403-1416.
9. Fischer MJ, Xie D, Jordan N, et al. Factors associated with depressive symptoms and use of antidepressant medications among participants in the Chronic Renal Insufficiency Cohort (CRIC) and Hispanic-CRIC Studies. *American journal of kidney diseases : the official journal of the National Kidney Foundation*. 2012;60(1):27-38.
10. Katon WJ, Lin EH, Russo J, et al. Cardiac risk factors in patients with diabetes mellitus and major depression. *Journal of general internal medicine*. 2004;19(12):1192-1199.
11. Nguyen TT, Wong TY, Islam FM, et al. Evidence of early retinal microvascular changes in patients with type 2 diabetes and depression. *Psychosomatic medicine*. 2010;72(6):535-538.
12. Ikram MA, Luijendijk HJ, Hofman A, et al. Retinal Vascular Calibers and Risk of Late-Life Depression: The Rotterdam Study. *Am J Geriatr Psychiatry*. 2010;18:5(May).
13. Aizenstein HJ, Andreescu C, Edelman KL, et al. fMRI correlates of white matter hyperintensities in

late-life depression. *Am J Psychiatry*. 2011;168(10):1075-1082.

14. Almeida JR, Alves TC, Wajngarten M, et al. Late-life depression, heart failure and frontal white matter hyperintensity: a structural magnetic resonance imaging study. *Brazilian journal of medical and biological research = Revista brasileira de pesquisas medicas e biologicas / Sociedade Brasileira de Biofisica ... [et al.]*. 2005;38(3):431-436.

15. Chatterjee K, Fall S, Barer D. Mood after stroke: a case control study of biochemical, neuro-imaging and socio-economic risk factors for major depression in stroke survivors. *BMC neurology*. 2010;10:125.

16. Chen Y, Chen X, Mok VC, Lam WW, Wong KS, Tang WK. Poststroke depression in patients with small subcortical infarcts. *Clinical neurology and neurosurgery*. 2009;111(3):256-260.

17. Colloby SJ, Vasudev A, O'Brien JT, Firbank MJ, Parry SW, Thomas AJ. Relationship of orthostatic blood pressure to white matter hyperintensities and subcortical volumes in late-life depression. *The British journal of psychiatry : the journal of mental science*. 2011;199(5):404-410.

18. Cyprien F, Courtet P, Poulain V, et al. Corpus callosum size may predict late-life depression in women: a 10-year follow-up study. *J Affect Disord*. 2014;165:16-23.

19. Dalby RB, Chakravarty MM, Ahdidan J, et al. Localization of white-matter lesions and effect of vascular risk factors in late-onset major depression. *Psychological medicine*. 2010;40(8):1389-1399.

20. de Groot JC, de Leeuw FE, Oudkerk M, Hofman A, Jolles J, Breteler MM. Cerebral white matter lesions and depressive symptoms in elderly adults. *Arch Gen Psychiatry*. 2000;57(11):1071-1076.

21. Delaloye C, Moy G, de Bilbao F, et al. Neuroanatomical and neuropsychological features of elderly euthymic depressed patients with early- and late-onset. *J Neurol Sci*. 2010;299(1-2):19-23.

22. Devantier TA, Norgaard BL, Poulsen MK, et al. White Matter Lesions, Carotid and Coronary Atherosclerosis in Late-Onset Depression and Healthy Controls. *Psychosomatics*. 2016;57(4):369-377.

23. Direk N, Perez HS, Akoudad S, et al. Markers of cerebral small vessel disease and severity of depression in the general population. *Psychiatry research*. 2016;253:1-6.

24. Dotson VM, Zonderman AB, Kraut MA, Resnick SM. Temporal relationships between depressive symptoms and white matter hyperintensities in older men and women. *International journal of geriatric psychiatry*. 2013;28(1):66-74.

25. Feng C, Fang M, Xu Y, Hua T, Liu XY. Microbleeds in late-life depression: comparison of early- and late-onset depression. *BioMed research international*. 2014;2014:682092.

26. Firbank MJ, O'Brien JT, Pakrasi S, et al. White matter hyperintensities and depression--preliminary results from the LADIS study. *International journal of geriatric psychiatry*. 2005;20(7):674-679.

27. Fujishima M, Maikusa N, Nakamura K, Nakatsuka M, Matsuda H, Meguro K. Mild cognitive impairment, poor episodic memory, and late-life depression are associated with cerebral cortical thinning and increased white matter hyperintensities. *Frontiers in aging neuroscience*. 2014;6:306.
28. Godin O, Dufouil C, Maillard P, et al. White matter lesions as a predictor of depression in the elderly: the 3C-Dijon study. *Biological psychiatry*. 2008;63(7):663-669.
29. Greenwald BS, Kramer-Ginsberg E, Krishnan KR, Ashtari M, Auerbach C, Patel M. Neuroanatomic localization of magnetic resonance imaging signal hyperintensities in geriatric depression. *Stroke*. 1998;29(3):613-617.
30. Grool AM, Gerritsen L, Zuithoff NP, Mali WP, van der Graaf Y, Geerlings MI. Lacunar infarcts in deep white matter are associated with higher and more fluctuating depressive symptoms during three years follow-up. *Biol Psychiatry*. 2013;73(2):169-176.
31. Gudmundsson LS, Scher AI, Sigurdsson S, et al. Migraine, depression, and brain volume: the AGES-Reykjavik Study. *Neurology*. 2013;80(23):2138-2144.
32. Hannestad J, Taylor WD, McQuoid DR, et al. White matter lesion volumes and caudate volumes in late-life depression. *International journal of geriatric psychiatry*. 2006;21(12):1193-1198.
33. Iosifescu DV, Papakostas GI, Lyoo IK, et al. Brain MRI white matter hyperintensities and one-carbon cycle metabolism in non-geriatric outpatients with major depressive disorder (Part I). *Psychiatry research*. 2005;140(3):291-299.
34. Janssen J, Hulshoff Pol HE, Lampe IK, et al. Hippocampal changes and white matter lesions in early-onset depression. *Biol Psychiatry*. 2004;56(11):825-831.
35. Janssen J, Hulshoff Pol HE, Schnack HG, et al. Cerebral volume measurements and subcortical white matter lesions and short-term treatment response in late life depression. *International journal of geriatric psychiatry*. 2007;22(5):468-474.
36. Jorm AF, Anstey KJ, Christensen H, et al. MRI hyperintensities and depressive symptoms in a community sample of individuals 60-64 years old. *Am J Psychiatry*. 2005;162(4):699-705.
37. Kieseppa T, Mantyla R, Tuulio-Henriksson A, et al. White matter hyperintensities and cognitive performance in adult patients with bipolar I, bipolar II, and major depressive disorders. *European psychiatry : the journal of the Association of European Psychiatrists*. 2014;29(4):226-232.
38. Kohler S, Thomas AJ, Lloyd A, Barber R, Almeida OP, O'Brien JT. White matter hyperintensities, cortisol levels, brain atrophy and continuing cognitive deficits in late-life depression. *The British journal of psychiatry : the journal of mental science*. 2010;196(2):143-149.

39. Krishnan MS, O'Brien JT, Firbank MJ, et al. Relationship between periventricular and deep white matter lesions and depressive symptoms in older people. The LADIS Study. *International journal of geriatric psychiatry*. 2006;21(10):983-989.
40. Kumar A, Bilker W, Jin Z, Udupa J. Atrophy and high intensity lesions: complementary neurobiological mechanisms in late-life major depression. *Neuropsychopharmacology : official publication of the American College of Neuropsychopharmacology*. 2000;22(3):264-274.
41. Lavretsky H, Zheng L, Weiner MW, et al. The MRI brain correlates of depressed mood, anhedonia, apathy, and anergia in older adults with and without cognitive impairment or dementia. *International journal of geriatric psychiatry*. 2008;23(10):1040-1050.
42. Lee SH, Payne ME, Steffens DC, et al. Subcortical lesion severity and orbitofrontal cortex volume in geriatric depression. *Biol Psychiatry*. 2003;54(5):529-533.
43. Lin HF, Kuo YT, Chiang IC, Chen HM, Chen CS. Structural abnormality on brain magnetic resonance imaging in late-onset major depressive disorder. *The Kaohsiung journal of medical sciences*. 2005;21(9):405-411.
44. MacFall JR, Taylor WD, Rex DE, et al. Lobar distribution of lesion volumes in late-life depression: the Biomedical Informatics Research Network (BIRN). *Neuropsychopharmacology : official publication of the American College of Neuropsychopharmacology*. 2006;31(7):1500-1507.
45. Murray AD, Staff RT, McNeil CJ, et al. Depressive symptoms in late life and cerebrovascular disease: the importance of intelligence and lesion location. *Depression and anxiety*. 2013;30(1):77-84.
46. Nys GM, van Zandvoort MJ, van der Worp HB, de Haan EH, de Kort PL, Kappelle LJ. Early depressive symptoms after stroke: neuropsychological correlates and lesion characteristics. *J Neurol Sci*. 2005;228(1):27-33.
47. Olesen PJ, Gustafson DR, Simoni M, et al. Temporal lobe atrophy and white matter lesions are related to major depression over 5 years in the elderly. *Neuropsychopharmacology : official publication of the American College of Neuropsychopharmacology*. 2010;35(13):2638-2645.
48. Paranthaman R, Greenstein AS, Burns AS, et al. Vascular function in older adults with depressive disorder. *Biol Psychiatry*. 2010;68(2):133-139.
49. Saavedra Perez HC, Direk N, Hofman A, Vernooij MW, Tiemeier H, Ikram MA. Silent brain infarcts: a cause of depression in the elderly? *Psychiatry research*. 2013;211(2):180-182.
50. Potter GG, Blackwell AD, McQuoid DR, et al. Prefrontal white matter lesions and prefrontal task impersistence in depressed and nondepressed elders. *Neuropsychopharmacology : official publication of the American College of Neuropsychopharmacology*. 2007;32(10):2135-2142.

51. Sheline YI, Price JL, Vaishnavi SN, et al. Regional white matter hyperintensity burden in automated segmentation distinguishes late-life depressed subjects from comparison subjects matched for vascular risk factors. *Am J Psychiatry*. 2008;165(4):524-532.
52. Shimony JS, Sheline YI, D'Angelo G, et al. Diffuse microstructural abnormalities of normal-appearing white matter in late life depression: a diffusion tensor imaging study. *Biol Psychiatry*. 2009;66(3):245-252.
53. Steffens DC, Krishnan KR, Crump C, Burke GL. Cerebrovascular disease and evolution of depressive symptoms in the cardiovascular health study. *Stroke*. 2002;33(6):1636-1644.
54. Steffens DC, Helms MJ, Krishnan KR, Burke GL. Cerebrovascular disease and depression symptoms in the cardiovascular health study. *Stroke*. 1999;30(10):2159-2166.
55. Tang WK, Chen YK, Lu JY, et al. White matter hyperintensities in post-stroke depression: a case control study. *J Neurol Neurosurg Psychiatry*. 2010;81(12):1312-1315.
56. Taylor WD, MacFall JR, Payne ME, et al. Greater MRI lesion volumes in elderly depressed subjects than in control subjects. *Psychiatry research*. 2005;139(1):1-7.
57. Taylor WD, MacFall JR, Payne ME, et al. Orbitofrontal cortex volume in late life depression: influence of hyperintense lesions and genetic polymorphisms. *Psychological Medicine*, 2007, 37, 1763–1773.
58. Teodorczuk A, Firbank MJ, Pantoni L, et al. Relationship between baseline white-matter changes and development of late-life depressive symptoms: 3-year results from the LADIS study. *Psychological medicine*. 2010;40(4):603-610.
59. Tudorascu DL, Rosano C, Venkatraman VK, et al. Multimodal MRI markers support a model of small vessel ischemia for depressive symptoms in very old adults. *Psychiatry research*. 2014;224(2):73-80.
60. Tupler LA, Krishnan KR, McDonald WM, Dombeck CB, D'Souza S, Steffens DC. Anatomic location and laterality of MRI signal hyperintensities in late-life depression. *Journal of psychosomatic research*. 2002;53(2):665-676.
61. van Sloten TT, Sigurdsson S, van Buchem MA, et al. Cerebral Small Vessel Disease and Association With Higher Incidence of Depressive Symptoms in a General Elderly Population: The AGES-Reykjavik Study. *Am J Psychiatry*. 2015;172(6):570-578.
62. van Uden IW, van Norden AG, de Laat KF, et al. Depressive Symptoms and Amygdala Volume in Elderly with Cerebral Small Vessel Disease: The RUN DMC Study. *J Aging Res*. 2011;2011:647869.
63. Vardi N, Freedman N, Lester H, et al. Hyperintensities on T2-weighted images in the basal ganglia of patients with major depression: cerebral perfusion and clinical implications. *Psychiatry research*.



2011;192(2):125-130.

64. Vardi N, Freedman N, Lester H, et al. Hyperintensities on T2-weighted images in the basal ganglia of patients with major depression: cerebral perfusion and clinical implications. *Psychiatry research*. 2011;192(2):125-130.

65. Versluis CE, van der Mast RC, van Buchem MA, et al. Progression of cerebral white matter lesions is not associated with development of depressive symptoms in elderly subjects at risk of cardiovascular disease: The PROSPER Study. *International journal of geriatric psychiatry*. 2006;21(4):375-381.

66. Videbech P, Ravnkilde B, Fiirgaard B, et al. Structural brain abnormalities in unselected in-patients with major depression. *Acta psychiatrica Scandinavica*. 2001;103(4):282-286.

67. Wu RH, Feng C, Xu Y, Hua T, Liu XY, Fang M. Late-onset depression in the absence of stroke: associated with silent brain infarctions, microbleeds and lesion locations. *International journal of medical sciences*. 2014;11(6):587-592.
